# Supplementary material for: Comparative Genomic Analysis of the Human Gut Microbiome Reveals a Broad Distribution of Metabolic Pathways for the Degradation of Host-Synthetized Mucin Glycans and Utilization of Mucin-Derived Monosaccharides
Source: PubMed Central journal article supplement (PMC5583593; doi:10.3389/fgene.2017.00111), 2017-08-29
Supplement: Image2.pdf [file Image2.pdf]

**Figure S2.** Maximum-likelihood tree for the FucA and RhaD proteins. Functions are shown by colors. The SEED identifiers for proteins are shown; for their sequences, see the file Sequences S1 in the Supplementary materials. Genome names are shown in brackets.

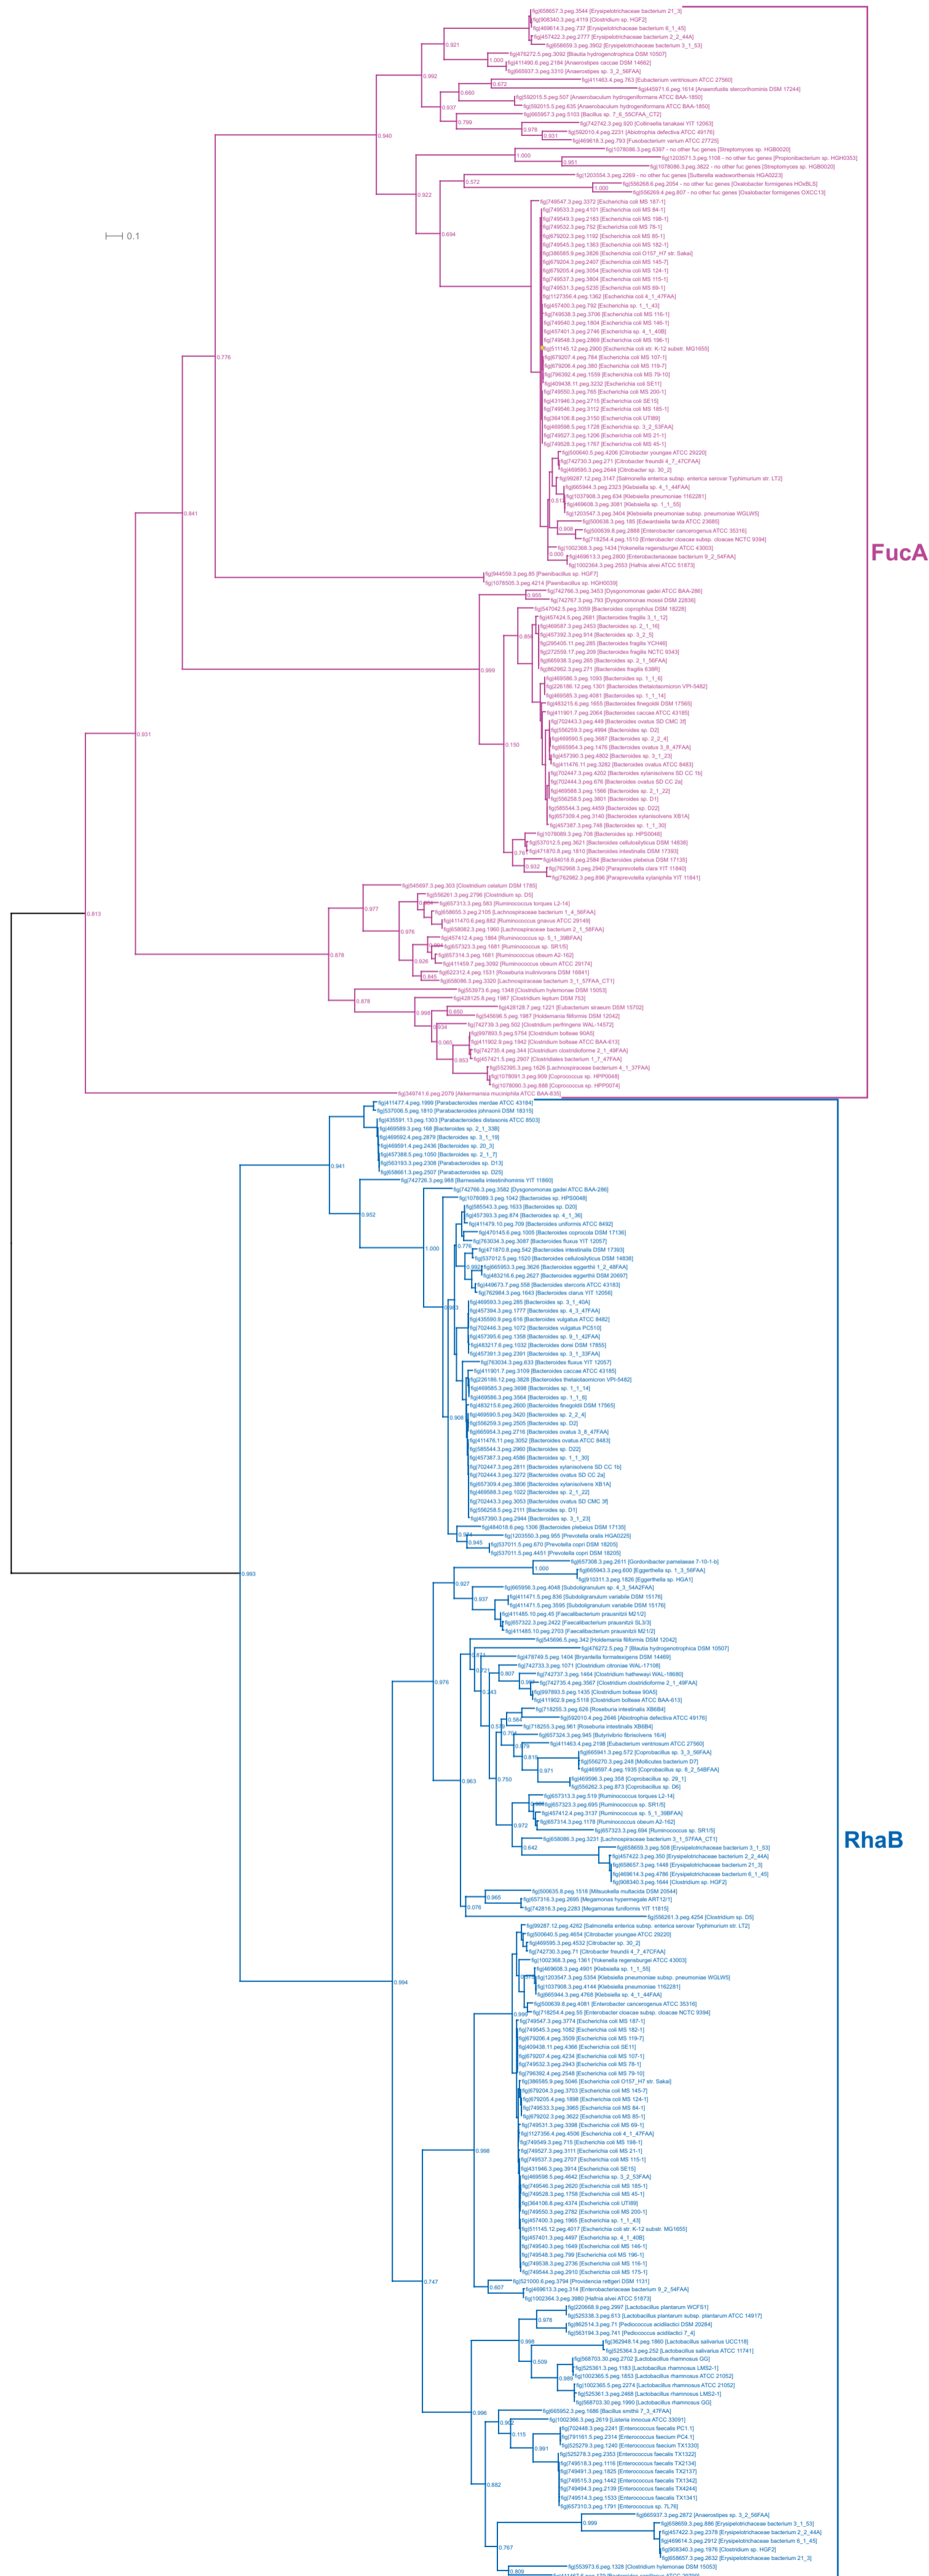

FucA

RhaB
